# Supplementary material for: Elevated miR-499 Levels Blunt the Cardiac Stress Response
Source: PLoS One. 2011 May 9;6(5):e19481. doi: 10.1371/journal.pone.0019481 (PMC3090396; doi:10.1371/journal.pone.0019481)
Supplement: Table S2 — Common genes altered in miR-499 transgenic lines, TG-17 and TG-9. For each gene, the gene symbol, genomic location, log ratios and fold change of TG versus WT are shown. (XLS) [file pone.0019481.s002.xls]

## Sheet: Sheet1
Table S2. Common Genes Altered in miR-499 Transgenic Lines, TG-17 and TG-9
Gene Symbol†	Chromosome¶	Coordinate start	Coordinate end	Log2ratio (TG-17/WT)	Log2ratio (TG-9/WT)	Fold Change (TG-17)	Fold Change (TG-9)
Olfr872	9	20064316	20065357	0.939	3.268	1.9172	9.6331
Myh7	14	55589525	55613386	0.916	3.094	1.88688	8.5386
Scgb1c1	7	148031476	148032531	0.49	1.966	1.40444	3.90683
Acta1	8	126415667	126418651	0.681	1.72	1.60325	3.29436
Syn2	2	115084920	115232014	0.568	1.668	1.48247	3.17774
Pah	10	86984682	87046880	1.336	1.588	2.5245	3.00632
Nppb	4	147360008	147361311	0.964	1.35	1.95071	2.54912
Fgl2	5	20878491	20884191	0.529	1.198	1.44293	2.29421
Grm1	10	10408394	10802154	0.597	1.07	1.51257	2.09943
Gck	11	5800823	5849602	0.811	0.96	1.75443	1.94531
Ankrd1	19	36186453	36194332	0.444	0.832	1.36037	1.78015
Obfc2a	1	51522706	51535243	0.474	0.802	1.38896	1.74352
Phlda1	10	110943342	110945704	0.526	0.654	1.43993	1.57352
Egr1	18	35019477	35024635	-1.33	0.586	-2.51403	1.50108
Dct	14	118412012	118451407	0.545	0.527	1.45902	1.44093
Dennd4a	9	64720801	64720946	0.324	0.459	1.2518	1.37459
Cyb5r4	9	86916864	86972282	-0.313	-0.417	-1.24229	-1.33515
Ppargc1a	5	51848876	51945100	0.937	-0.522	1.91454	-1.43594
Lypla1	1	4797943	4836817	-0.385	-0.554	-1.30586	-1.46815
Csrp2	10	110357232	110376678	-0.455	-0.608	-1.37078	-1.52414
Lzic	4	148859442	148870777	-0.303	-0.685	-1.23371	-1.6077
Bcat2	7	52825728	52845082	-0.36	-0.719	-1.28343	-1.64604
Ly75	2	60130160	60221321	-0.698	-0.805	-1.62225	-1.74715
Klhl23	2	69660427	69674705	-0.435	-0.899	-1.35191	-1.86477
Ndrg4	8	98201986	98239019	-0.554	-0.924	-1.46815	-1.89737
Gpt	15	76527163	76530116	-0.399	-0.925	-1.31859	-1.89868
Hcn2	10	79179379	79198853	-0.413	-0.932	-1.33145	-1.90792
Adamts3	5	90139682	90139765	-0.413	-0.992	-1.33145	-1.98894
Adamts3	5	90127229	90127352	-0.429	-1.07	-1.3463	-2.09943
Dbt	3	116216025	116252896	-0.497	-1.315	-1.41128	-2.48802
Mrgprh	17	13068900	13070708	-0.377	-1.809	-1.29864	-3.50399
Pfkfb1	X	147024464	147078403	-0.61	-2.103	-1.52626	-4.29602
†Genes ordered by fold change in higher-expressing transgenic line TG-9 ¶July 2007 mouse genoe, mm9
